# Supplementary material for: National recommendations for the management of children and young people with IgA vasculitis: a best available evidence, group agreement-based approach
Source: PubMed Central journal article supplement (PMC11671997; doi:10.1136/archdischild-2024-327364), 2024-10-08
Supplement: archdischild-110-1-s001.pdf [file archdischild-110-1-s001.pdf]

### Supplementary information

1. A list of stakeholder groups that were directly given the opportunity to feedback on the scope document

| <b>Stakeholder</b>                                                                   |
|--------------------------------------------------------------------------------------|
| British society of Paediatric gastroenterology, hepatology and nutrition (BSPGHAN)   |
| British Society of Rheumatology (BSR)                                                |
| Association of Paediatric Emergency Medicine APEM                                    |
| Royal College of Emergency Medicine RCEM                                             |
| Paediatric Emergency Medicine research collaborative for the UK and Ireland (PERUKI) |
| British association of paediatric surgery BAPS                                       |
| Royal College of General Practitioners (RCGP)                                        |
| British Society of Paediatric radiology BSPR                                         |
| Royal College of Pathologists                                                        |
| British association of general paediatrics                                           |
| General and adolescent research collaboration UK and Ireland (GAPR-UKI)              |
| British Society of Paediatric Dermatology (BSPD)                                     |
| Kidney care UK                                                                       |
| Vasculitis UK                                                                        |
| Versus arthritis UK                                                                  |
| Barbara Ansell Network (BANNAR)                                                      |
